# Supplementary material for: Phase I Study of Rapid Alternation of Sunitinib and Regorafenib for the Treatment of Tyrosine Kinase Inhibitor Refractory Gastrointestinal Stromal Tumors
Source: Oxford University Press journal article supplement (doi:10.1158/1078-0432.ccr-19-2150), 2019-08-30
Supplement: 10780432ccr192150-sup-224876_2_supp_5708420_pw6k22.docx [file 10780432ccr192150-sup-224876_2_supp_5708420_pw6k22.docx]

**Supplementary Table S1.** Pharmacokinetic collection time-points (pre-dose) for sunitinib and its metabolite (SU012662), and regorafenib and its metabolites (M2 and M5).

| **Day** | 1 | 2 | 3 | 4 | 5 | 6 | 7 | 8 | 9 | 10 | 11 | 12 | 13 | 14 | 15 | 16 | 17 | 18 | 19 | 20 | 21 | 22 | 23 | 24 | 25 |
| --- | --- | --- | --- | --- | --- | --- | --- | --- | --- | --- | --- | --- | --- | --- | --- | --- | --- | --- | --- | --- | --- | --- | --- | --- | --- |
| **Drug** |  |  |  |  |  |  |  |  |  |  |  |  |  |  |  |  |  |  |  |  |  |  |  |  |  |
| SU | X | X | X |  |  |  |  | X | X | X |  |  |  |  | X | X | X |  |  |  |  | X | X | X |  |
| PK SU | X |  |  |  |  |  |  |  |  |  |  |  |  |  | X |  |  | X |  |  |  | X |  |  | X |
| **Drug** |  |  |  |  |  |  |  |  |  |  |  |  |  |  |  |  |  |  |  |  |  |  |  |  |  |
| RE |  |  |  | X | X | X | X |  |  |  | X | X | X | X |  |  |  | X | X | X | X |  |  |  |  |
| PK RE |  |  |  | X |  |  |  | X |  |  | X |  |  |  | X |  |  | X |  |  |  | X |  |  | X |
